# Supplementary material for: Carbon Ion Irradiated Neural Injury Induced the Peripheral Immune Effects in Vitro or in Vivo
Source: PubMed Central journal article supplement (PMC4691056; doi:10.3390/ijms161226109), 2015-11-30
Supplement: ijms-16-26109-s001.pdf [file ijms-16-26109-s001.pdf]

# Supplementary Materials: Carbon Ion Irradiated Neural Injury Induced the Peripheral Immune Effects *in Vitro* or *in Vivo*

Runhong Lei, Tuo Zhao, Qiang Li, Xiao Wang, Hong Ma and Yulin Deng

Table S1. Primers' sequence.

| Name  | Forward (5'-3')      | Reverse (5'-3')      |
|-------|----------------------|----------------------|
| c-kit | GATGCTCAAACCAAGTGCCC | GCGCCAAGCAGGTTTACAAT |
| Sca1  | ACCCCTATGAGTCCAGGCAT | CCGCTCTTGTCATTGAGGGT |
| Rag1  | CCCGTGGACGCTAAACTCA  | ATCTGCCTTCACGTCGATCC |
| Rag2  | TCAGGACGGGCTGTCTTTTC | TGCAATTCAGTCTGGGGTA  |
| GAPDH | CTCATGACCACAGTCCATGC | TTCAGCTCTGGGATGACCTT |

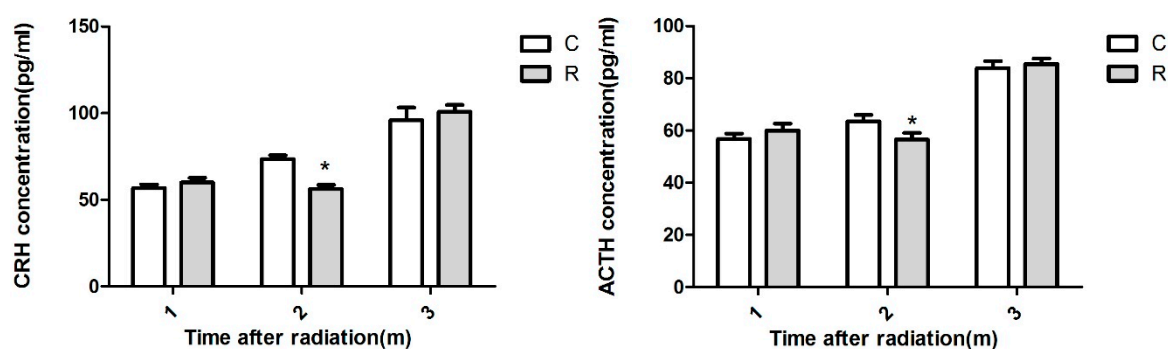

Figure S1. Concentrations of corticotrophin-releasing hormone (CRH) and adrenocorticotrophic hormone (ACTH) in the peripheral blood. C: control group (mock irradiated). R: Brain-localized radiation group. m: month.  $n = 7$ . \*  $p < 0.05$ .

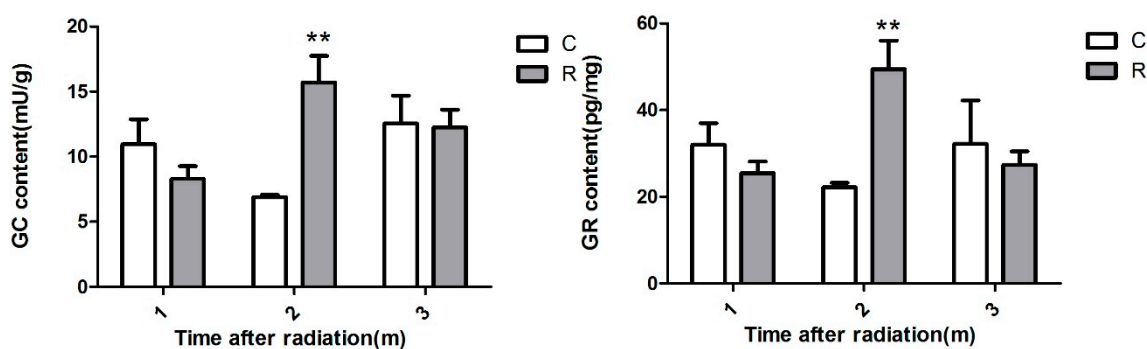

Figure S2. Concentrations of glucocorticoids (GC) and glucocorticoid receptor (GR) in thymus. C: control group (mock irradiated). R: Brain-localized radiation group. m: month.  $n = 7$ . \*\*  $p < 0.01$ .
